# Supplementary material
Source: PubMed Central journal article supplement (PMC4615313)
Supplement: NIHMS696128-supplement-Figure_S1.pdf [file NIHMS696128-supplement-Figure_S1.pdf]

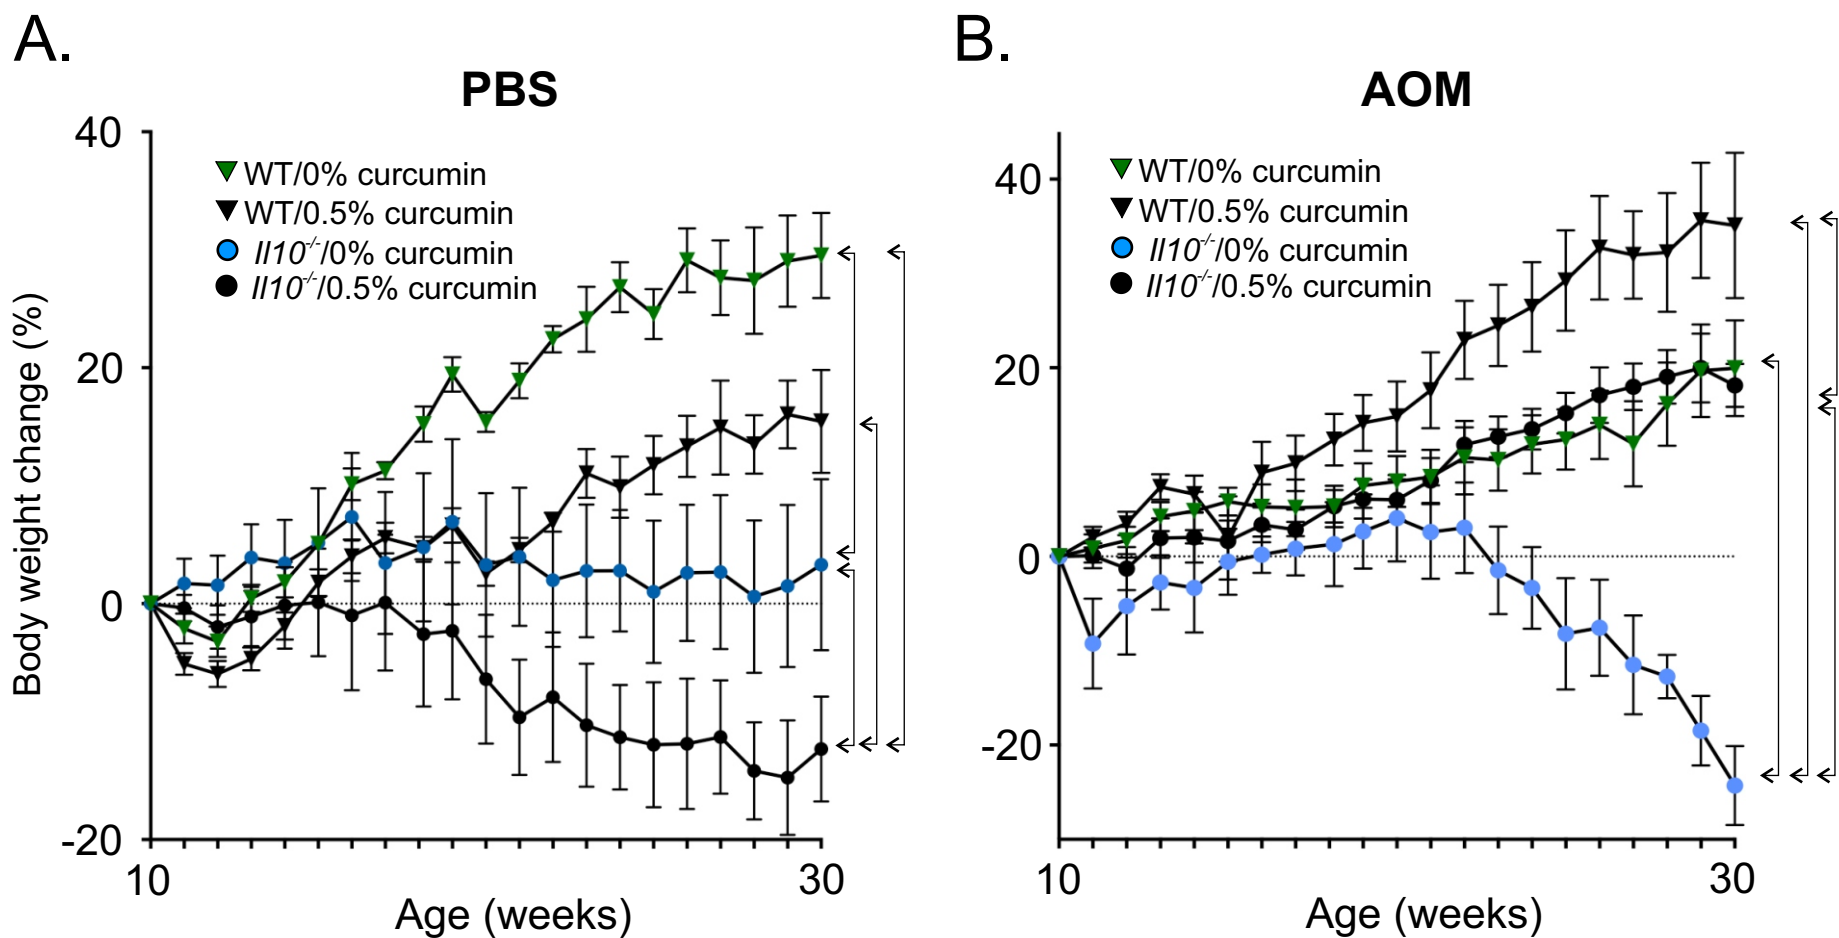

**Figure S1. (A) Body weight change in WT and *Il10*<sup>-/-</sup> mice injected with PBS or (B) exposed to AOM.** Body weight change was calculated for individual mice and plotted as a relative value compared to the day of diet change and first PBS/AOM injection (week 10). Arrows to the right of each graph indicate significant ( $p < 0.05$ ) differences among indicated groups at week 30 (ANOVA followed by Tukey test).
