# Supplementary material
Source: PubMed Central journal article supplement (PMC4615313)
Supplement: NIHMS696128-supplement-Figure_S2.pdf [file NIHMS696128-supplement-Figure_S2.pdf]

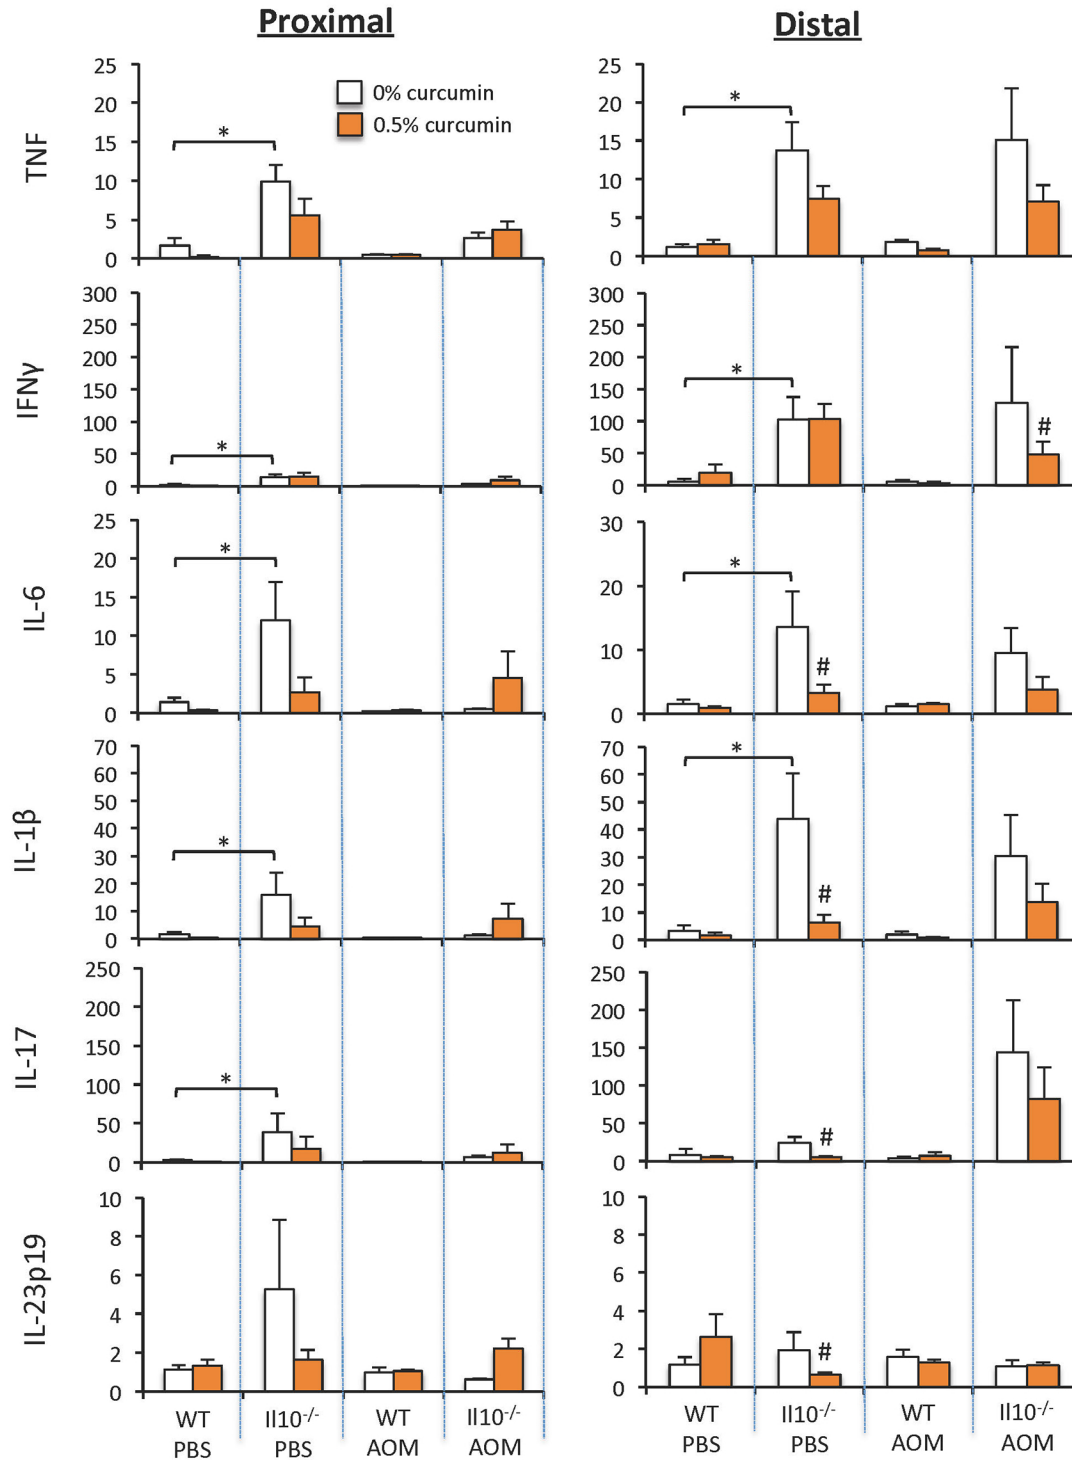

**Figure S2.** qPCR analysis of mucosal cytokine mRNA expression indicates negligible anti-inflammatory effects of 0.5% curcumin in AOM-treated II10<sup>-/-</sup> mice. RNA was isolated and analyzed as described in Materials and Methods section. Each sample was normalized to GAPDH expression. Bars represent means and SEM. # indicates a significant ( $p < 0.05$ ) difference from 0% curcumin dietary group within respective treatment group (bar cluster; unpaired t-test). \* indicates a significant ( $p < 0.05$ ) difference between bars indicated by brackets (unpaired t-test).
