# Supplementary material
Source: PubMed Central journal article supplement (PMC4615313)
Supplement: NIHMS696128-supplement-Figure_S3.pdf [file NIHMS696128-supplement-Figure_S3.pdf]

Fig. S3

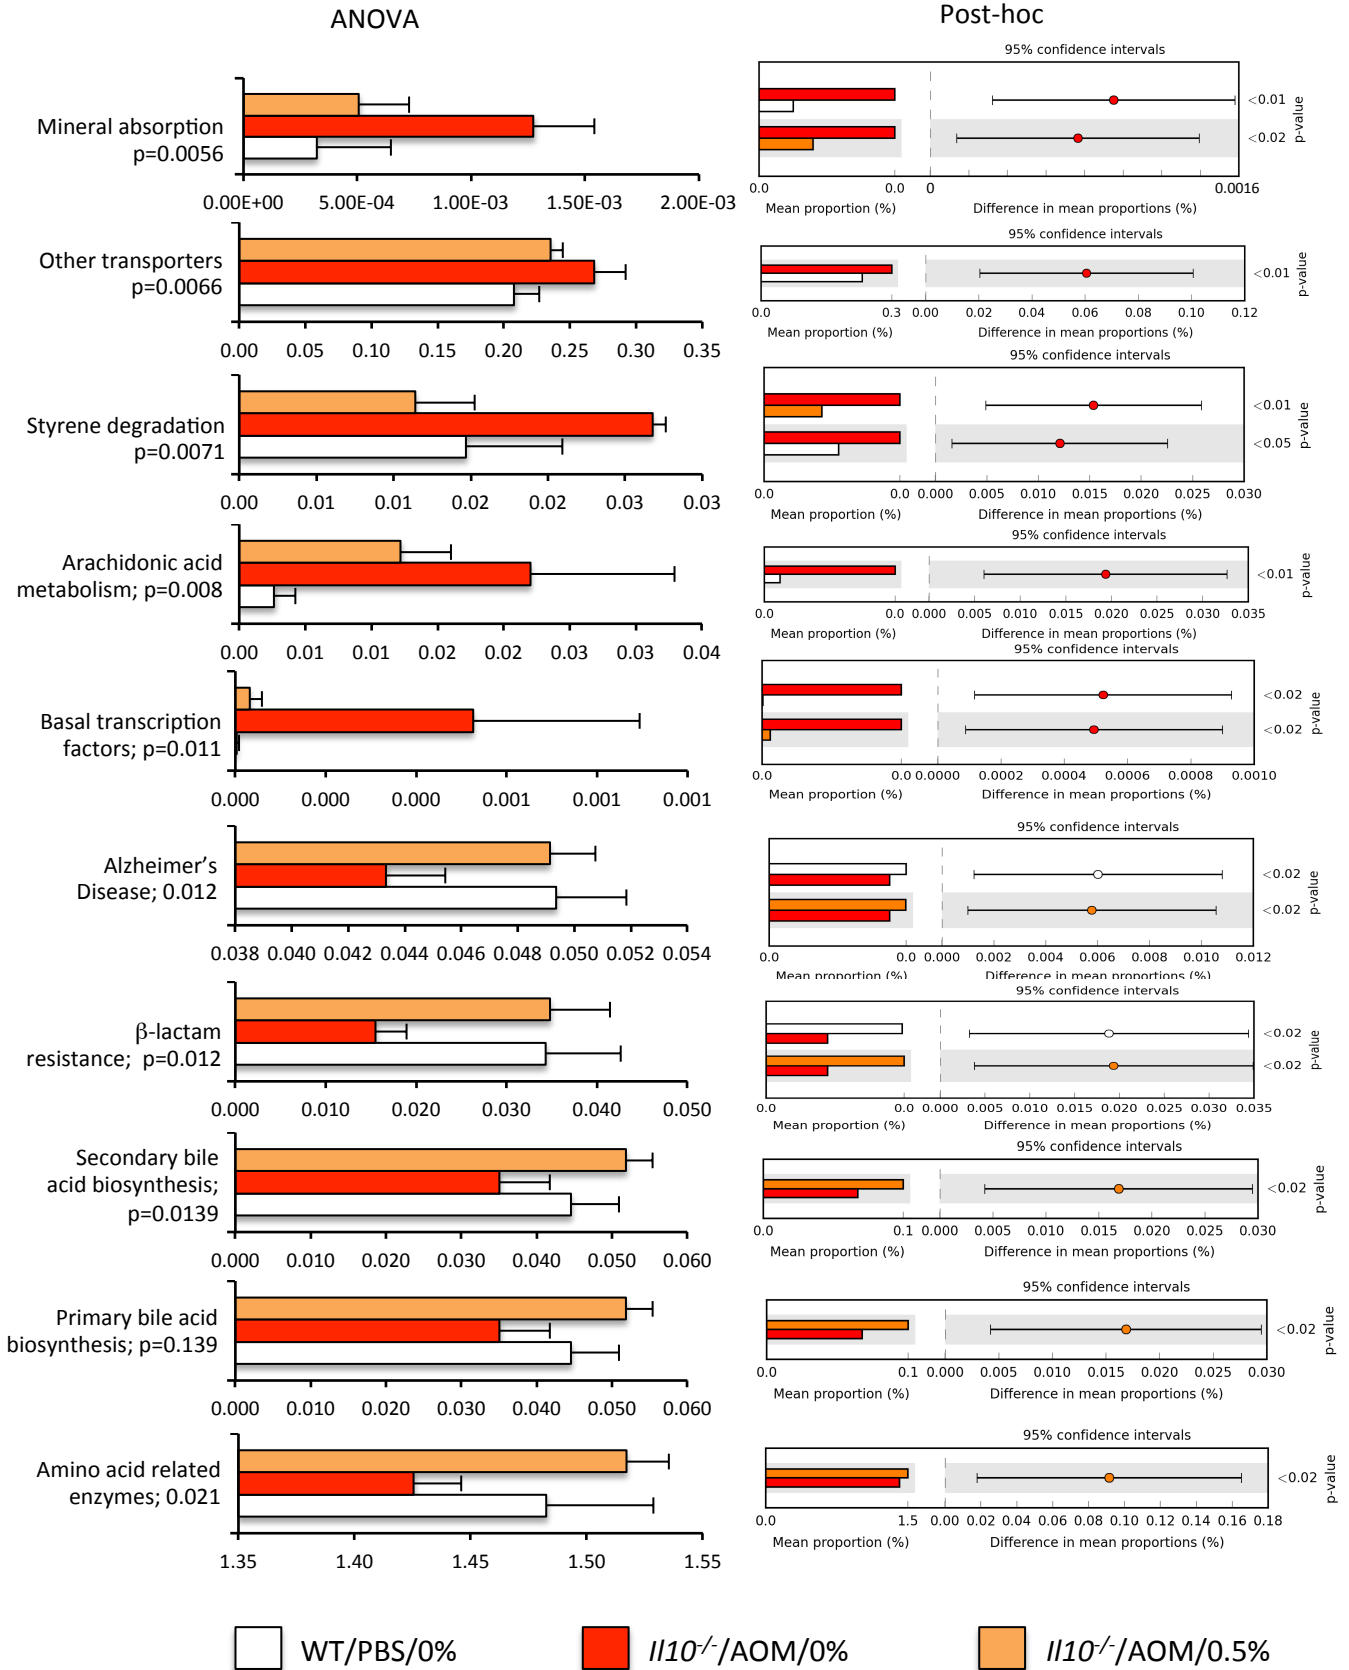

Fig. S3 (cont.)

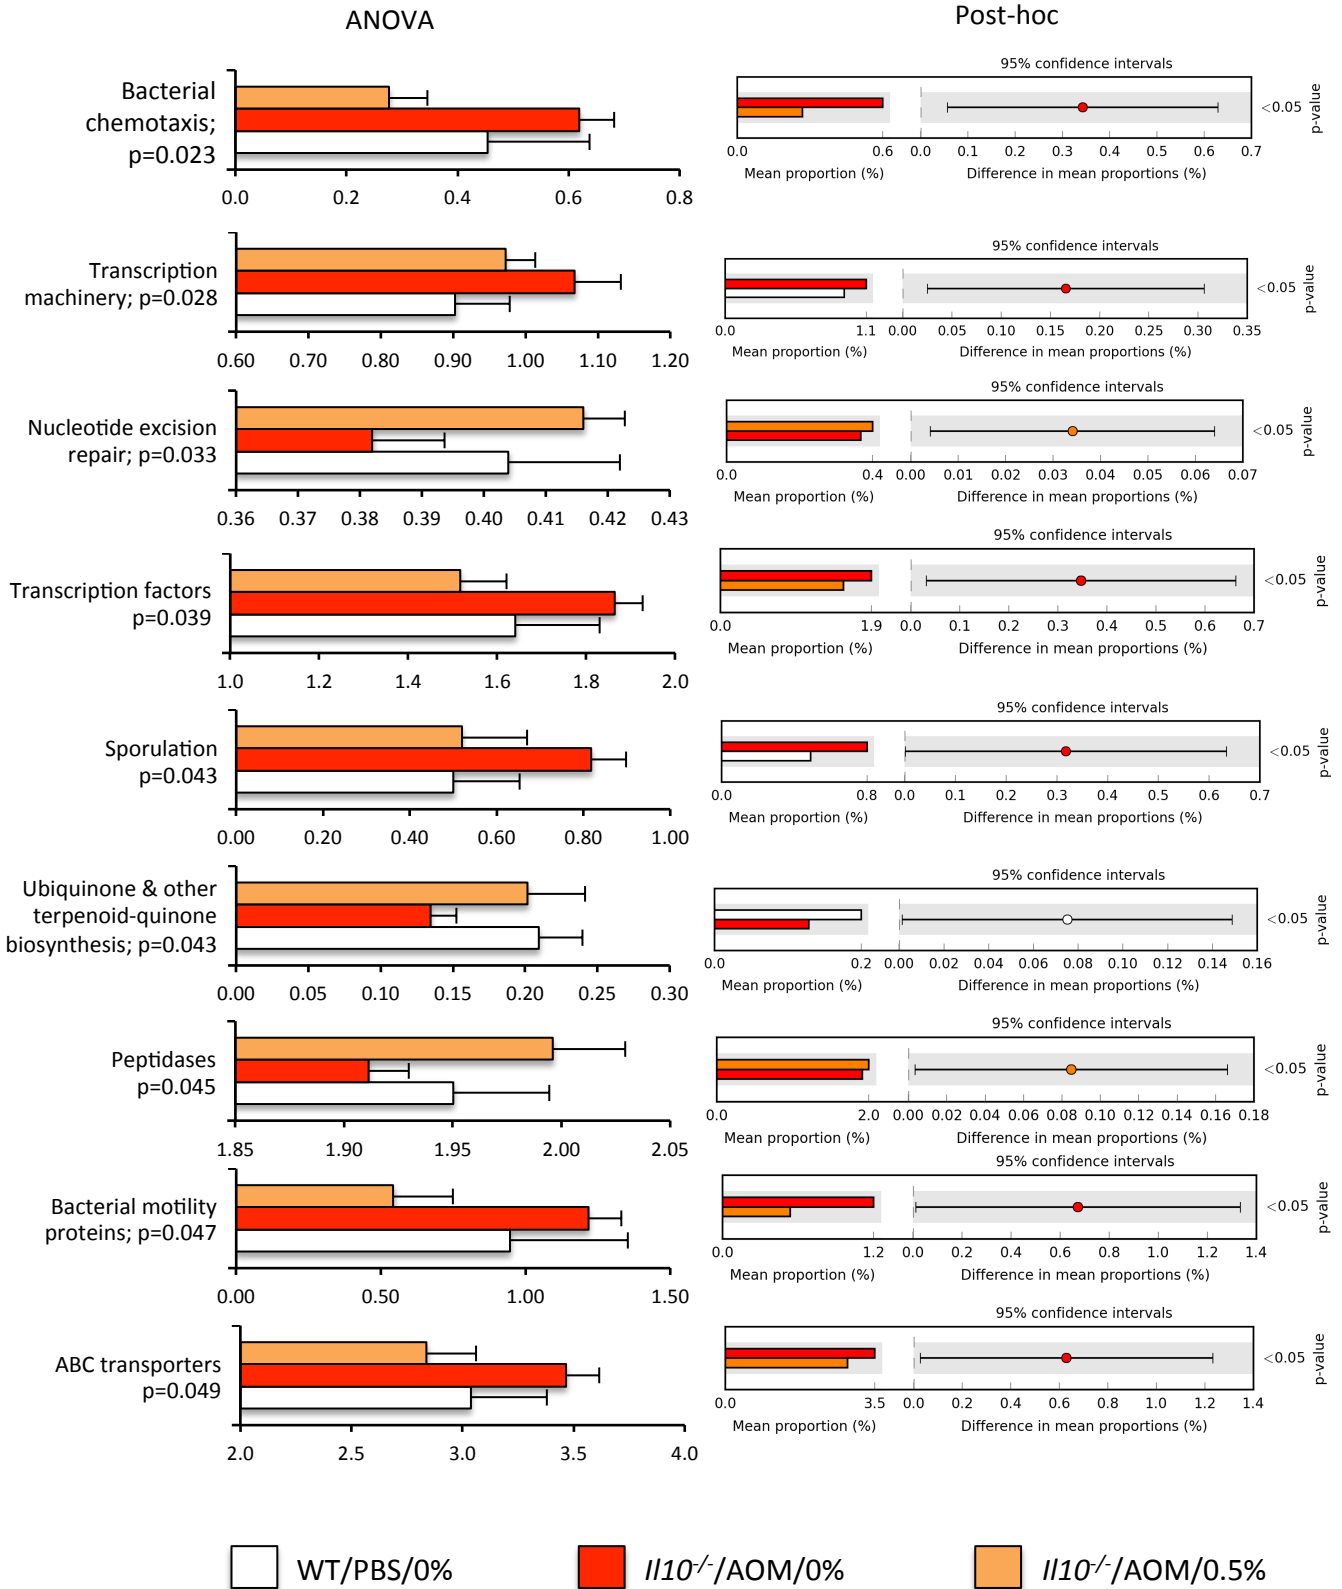

**Figure S3. The results of PICRUSt analysis of the effect of 0.5% curcumin-supplemented diet in AOM-treated *Il10*<sup>-/-</sup> mice.** Relative functional abundance was calculated, analyzed, and associated with KEGG pathways using PICRUSt and STAMP software. KEGG orthologies were selected where ANOVA  $p < 0.05$  AND no significant difference was seen between AOM/*Il10*<sup>-/-</sup>/0% and AOM/*Il10*<sup>-/-</sup>/0.5% groups (Tukey-Kramer post-hoc test). KEGG categories are sorted top-bottom from the lowest to highest p value. The results of post-hoc test are depicted to the right from each mean  $\pm$ SD/ANOVA graphs.
